# Supplementary material for: Effects of a Protic Ionic Liquid on the Reaction Pathway during Non-Aqueous Sol–Gel Synthesis of Silica: A Raman Spectroscopic Investigation
Source: MDPI journal article supplement (doi:10.3390/ijms15046488), 2014-04-16
Supplement: s1 [file s1]

## Supplementary Information

**Figure S1.** Experimentally recorded Raman spectra during the sol-gel reaction in the absence of the protic ionic liquid, for reaction times equal to 0.49, 0.60, 1.13, and 1.35  $t/t_{gel}$ , from top to bottom. For each plot the fitting components, the fit results, and the fit residuals are shown. The red and blue curves found below  $530\text{ cm}^{-1}$  are assigned to the  $D_1$  and R network modes.

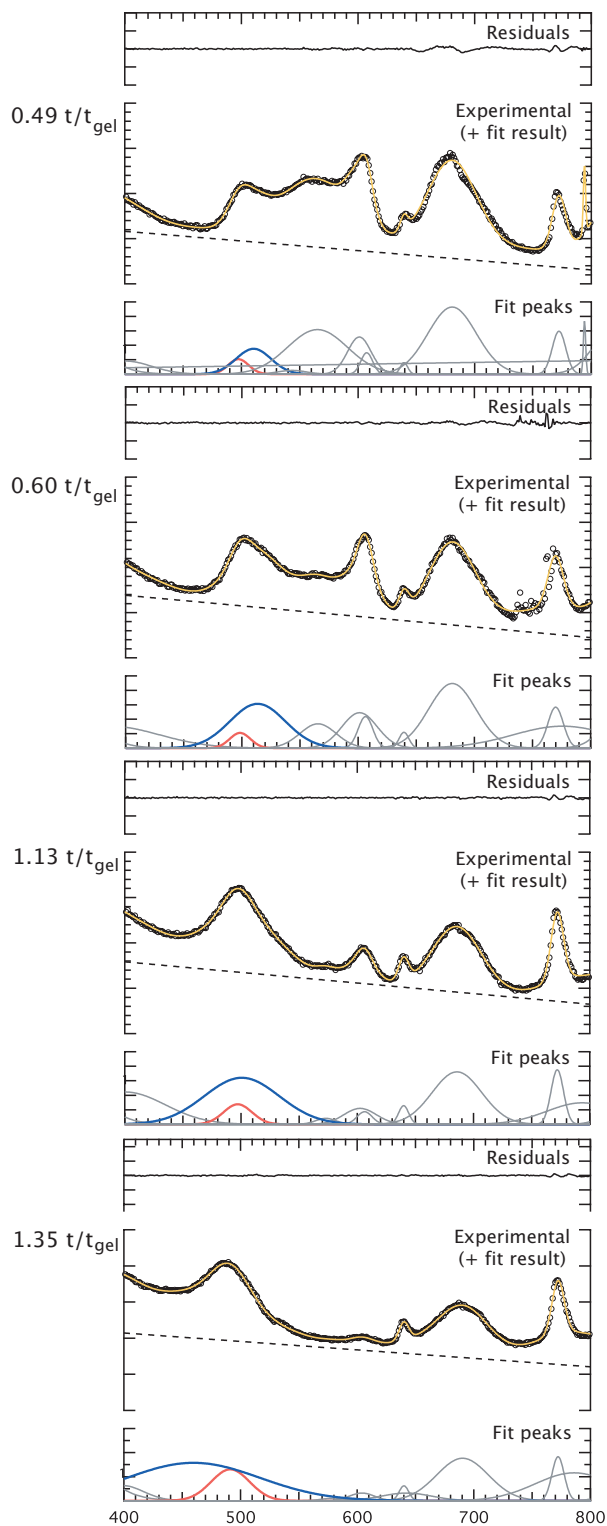

**Figure S2.** Raman spectra recorded for the aged gel (black) and the aged ionogel (red), *i.e.*, after 7 months from preparation. For the ionogel, the spectrum shown is indeed a difference spectrum between the ionogel and the pure ionic liquid, to reveal the spectral features due to silica.

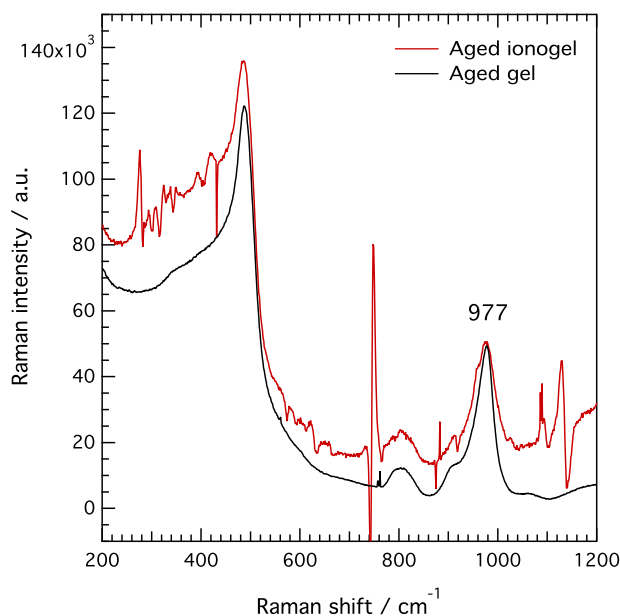

© 2014 by the authors; licensee MDPI, Basel, Switzerland. This article is an open access article distributed under the terms and conditions of the Creative Commons Attribution license (<http://creativecommons.org/licenses/by/3.0/>).
